# Supplementary material for: Explicit Training to Improve Affective Prosody Recognition in Adults with Acute Right Hemisphere Stroke
Source: Brain Sci. 2021 May 20;11(5):667. doi: 10.3390/brainsci11050667 (PMC8161405; doi:10.3390/brainsci11050667)
Supplement: Supplementary file 1 [file brainsci-11-00667-s001.zip › brainsci-1214704-supplementary.pdf]

## Supplementary Materials

Table S1. List of real-word sentences assessed during affective prosody recognition.

| Emotion   | Sentence                               |
|-----------|----------------------------------------|
| Happy     | She went to the store to get more      |
| Happy     | The teacher wrote three names down     |
| Happy     | She did not know him before this       |
| Happy     | We walked through the park to get here |
| Sad       | This is his first day at the office    |
| Sad       | She read the story in the newspaper    |
| Sad       | He sold his car to his neighbor        |
| Sad       | She ordered a cake for Thursday        |
| Angry     | Her husband came to the party          |
| Angry     | She cooked pancakes for breakfast      |
| Angry     | We bought shoes for the children       |
| Angry     | He ordered another pizza for us        |
| Afraid    | I never saw that person before today   |
| Afraid    | I will be going home today             |
| Afraid    | They bought a new boat                 |
| Afraid    | We had hamburgers for supper           |
| Surprised | The woman was running by our house     |
| Surprised | She will be going to the new school    |
| Surprised | They bought the house next door        |
| Surprised | This is the second time she competed   |
| Bored     | The man knocked on our front door      |
| Bored     | He will talk to her about the book     |
| Bored     | He went to the other race              |
| Bored     | He paid the bill on Friday             |

Note: Only *happy*, *sad*, *angry*, and *afraid* sentences were included in analyses.
